## Transcription through the *iab-7* cis-regulatory domain of the bithorax complex interferes with maintenance of *Polycomb*-mediated silencing

Ilham Hogga and François Karch

Department of Zoology and Animal Biology, University of Geneva, 30 quai E. Ansermet, 1211 Geneva-4, Switzerland

Author for correspondence: (e-mail: francois.karch@zoo.unige.ch)

Accepted 16 July 2002

### SUMMARY

The *Fab-7* chromatin domain boundary insures functional autonomy of the *iab-6* and *iab-7* cis-regulatory domains in the bithorax complex (BX-C). We have previously shown that chromatin insulators such as *gypsy* or *scs*<sup>min</sup> are potent insulators that cannot substitute for *Fab-7* function within the BX-C. During the early stages of these swapping experiments, we initially used a fragment of *scs* that was slightly larger than a minimal *scs* element (*scs*<sup>min</sup>). We report that this *scs* fragment, unlike *scs*<sup>min</sup>, interferes in an orientation-dependent manner with the output of a regulatory region covering 80 kb of DNA (from *iab-4* to *iab-8*). At the core of this orientation-dependent phenotype is

a promoter located immediately adjacent to the *scs* insulator. In one orientation, the promoter traps the activity of the *iab-3* through *iab-5* cis-regulatory domains, diverting them from the *abd-A* gene. In the opposite orientation, the promoter is transcribing the *iab-7* cis-regulatory domain, resulting in ectopic activation of the latter. Our data suggest that transcription through a *Polycomb*-Response Element (PRE) interferes with the maintenance of a *Polycomb* repression complex.

Key words: Boundary, Insulator, *Scs*, *Fab-7*, Bithorax complex, *Polycomb*, Transcription, Silencing, *Drosophila*

### INTRODUCTION

The bithorax complex (BX-C) contains three homeotic genes, *Ubx*, *abd-A* and *Abd-B*, that are responsible for determining the identity of parasegments 5 to 14 (PS5–14). These parasegments will form the posterior thorax (T2 and T3) and all eight abdominal segments of the adult fly (A1 to A8) (Lewis, 1978; Sanchez-Herrero et al., 1985). The PS-specific expression pattern of *Ubx*, *abd-A* and *Abd-B* is controlled by a large cis-regulatory region that covers 300 kb of DNA and that is subdivided into nine functionally autonomous cis-regulatory domains (*abx/bx*, *bxd/pbx*, *iab-2* to *iab-8*) (for reviews, see Duncan, 1987; Peifer et al., 1987). For example, the *iab-5* cis-regulatory domain regulates *Abd-B* expression in a pattern that confers PS10/A5 identity to the cells of that PS. Similarly, the *iab-6*, *iab-7* and *iab-8* cis-regulatory domains activate *Abd-B* expression in patterns appropriate for PS11/A6, PS12/A7 and PS13/A8 identity, respectively (Celniker et al., 1990; Sanchez-Herrero, 1991). When one of the cis-regulatory domains is inactivated, the parasegment specified by the affected regulatory domain is transformed into a copy of the PS immediately anterior. Thus, in a deletion of *iab-7*, PS12/A7 is transformed into PS11/A6. In this case, *Abd-B* expression in both PS11 and PS12 is driven by the *iab-6* cis-regulatory domain alone (Galloni et al., 1993).

The regulation of the BX-C homeotic genes during embryogenesis is subdivided into two phases: initiation and maintenance. In the initiation phase, the products of the gap and pair-rule segmentation genes are responsible for initiating

the parasegment specific expression of the BX-C homeotic genes. These proteins interact with target sequences (called initiation elements) in the nine cis-regulatory domains (Simon et al., 1990; Qian et al., 1991; Muller and Bienz, 1992; Shimell et al., 1994). However, the products of the segmentation genes are present only transiently in the early embryo. Maintenance of the initial pattern requires the *trithorax-Group* (*trx-G*) and *Polycomb-Group* (*Pc-G*) genes. The *trx-G* genes function to keep the homeotic genes on, while the *Pc-G* genes function to maintain the inactive state of the homeotic genes (reviewed by Paro, 1990; Simon and Tamkun, 2002). Experiments with reporter constructs have identified elements, called *Polycomb* Response elements or PREs, in several of the BX-C cis-regulatory domains, that appear to be targets for *Pc-G* action. When these PREs are combined with a parasegment-specific initiation element, they maintain the parasegmentally restricted expression pattern conferred on the reporter by the initiation element (Muller and Bienz, 1991; Busturia and Bienz, 1993; Simon et al., 1993; Chan et al., 1994; Chiang et al., 1995; Poux et al., 1996). In addition to this maintenance activity, PREs are also able to repress the activity of the mini-white reporter gene used to establish transgenic lines. Usually, transgenic lines carrying the mini-white gene harbor darker eye color when the inserts are homozygous. When they are included in a *mini-white* transgene, the PREs repress or even eliminate *mini-white* expression when the animals are homozygous (a phenomenon referred to as the pairing-sensitive repression assay) (Kassis et al., 1991; Chan et al., 1994; Gindhart and Kaufman, 1995;

Hagstrom et al., 1997; Muller et al., 1999) (for a review, see Pirrotta and Rastelli, 1994).

Genetic and molecular analysis has identified chromatin domain boundaries that demarcate the *cis*-regulatory domains, insuring the functional autonomy of each regulatory domain (Gyurkovics et al., 1990; Galloni et al., 1993; Mihaly et al., 1997; Zhou et al., 1999; Barges et al., 2000) (for a review, see Mihaly et al., 1998). For example, in PS11, the *Fab-7* boundary protects the active *iab-6* *cis*-regulatory domain from the inactive *iab-7* domain, preventing inappropriate regulatory interactions between the two domains. Immediately adjacent to the *Fab-7* boundary, lies the *iab-7*PRE, which is involved in maintaining inactivity of *iab-7* in parasegments anterior to PS12 (Hagstrom et al., 1997; Mihaly et al., 1997).

Two classes of mutations affect the *Fab-7* region. Class II mutations, such as *Fab-7<sup>2</sup>*, delete the boundary alone and leave the nearby *iab-7* PRE intact. They lead to a mixed gain- and loss-of-function phenotype in PS11/A6; there are groups of cells acquiring PS10/A5 identity, because in these cells both *iab-6* and *iab-7* are inactive. The remaining cells of PS11 adopt a PS12/A7 fate, because both *iab-6* and *iab-7* are active in these cells. This mixed gain- and loss-of-function phenotype arises because there is a competition in the fused *cis*-regulatory domain between positive elements in *iab-6* that ectopically activate *iab-7* and negative elements in *iab-7* that ectopically silence *iab-6*. Class I mutations, such as the original *Fab-7<sup>1</sup>* allele, are larger deletions that remove not only the boundary but also the nearby *iab-7* PRE. In this class of mutation, the balance between gain- and loss-of-function phenotype is shifted towards gain-of-function, and A6 is completely transformed into A7 (see Fig. 2B) (Mihaly et al., 1997).

Most chromatin domain boundaries in higher eukaryotes have been identified by their ability to block enhancer-promoter interactions when intercalated between them (enhancer-blocking assay) (for reviews, see Gerasimova and Corces, 1996; Geyer, 1997; Sun and Elgin, 1999; Bell et al., 2001). In our terminology, we call elements defined in the enhancer-blocking assay chromatin insulator. In *Drosophila* two insulators, *scs/scs'* (Kellum and Schedl, 1991; Kellum and Schedl, 1992) and *gypsy* (Geyer and Corces, 1992; Roseman et al., 1993) have been extensively studied in the enhancer-blocking assay. We have previously described that *gypsy* or a minimal *scs* fragment (*scs<sup>min</sup>*) cannot substitute for *Fab-7*; their enhancer-blocking activity prevents the *iab-5* and *iab-6* *cis*-regulatory domains from interacting with the *Abd-B* target promoter (Hogga et al., 2001). We describe the results of experiments in which we replace *Fab-7* by a slightly larger *scs* fragment that was used in enhancer-blocker experiments by different laboratories (Kellum and Schedl, 1991; Kellum and Schedl, 1992; Vazquez and Schedl, 1994; Dunaway et al., 1997; Krebs and Dunaway, 1998; Parnell and Geyer, 2000). Surprisingly, this *scs* fragment behaves differently than *scs<sup>min</sup>* and leads to opposite gain- and loss-of-function phenotype depending on its orientation within the context of the *Fab-7* region. The orientation-dependent effect is due to the presence of a promoter immediately adjacent to the *scs* insulator. Our results suggest that transcription through the *iab-7* PRE interferes with the maintenance of a *Polycomb* repression complex on the *iab-7* domain.

## MATERIALS AND METHODS

### Gene conversion

*Fab-7* was replaced by *scs<sup>prom</sup>* (or *promSCS*) using the gene conversion strategy described by Hogga et al. (Hogga et al., 2001).

### DNA techniques, fly work, antibody staining and in situ hybridization

DNA techniques, fly work, antibody staining and in situ hybridization have been described previously (Mihaly et al., 1997; Hogga et al., 2001; Zhou et al., 1999). The antibody against ABD-B was kindly provided by Sue Celniker (Celniker, 1990).

### Abdominal cuticles

Adult abdominal cuticles were mounted as described elsewhere (Mihaly et al., 1997), examined and photographed on an Axioplan microscope with a 5× lens. Only half cuticles are shown in Fig. 2. The dorsal surface of each abdominal segment has a rectangular plate of hard cuticle called the tergite (only half of the tergites are visible on the left of each panel, as well as the genitalia at the bottom). The ventral surface of abdominal segments is composed of soft cuticle called the pleura. On the ventral midline of the second (A2) and more posterior segments, there are small plates of harder cuticle called sternites. In males only six abdominal segments are visible. The tergites on A5 and A6 are pigmented and can be therefore distinguished from more anterior tergites. On the ventral side, the sixth sternites can be distinguished from the more anterior sternites by its different shape and by the absence of bristles. Homeotic transformations associated with *Fab-7* are best visible in males where most (*Fab-7<sup>2</sup>*) or all of A6 (*Fab-7<sup>1</sup>*) is missing (see Fig. 2B). As A7 and A8 do not contribute to any visible cuticle after metamorphosis in males, homeotic transformations associated with *Fab-8* are detected in females where A7 develops as a smaller segments than the anterior segments (see Fig. 2C).

## RESULTS AND DISCUSSION

### Orientation dependent effects of *scs* when integrated in the BX-C

The slightly larger *scs* fragment used to replace *Fab-7* in the present studies is depicted in Fig. 1. The extra-DNA (relative to *scs<sup>min</sup>*) consists in the 282bp *MluI-PstI* fragment at one edge of *scs<sup>min</sup>*. In the *promSCS* convertant line, the 282 bp extra DNA fragment faces *iab-6*. In *scs<sup>prom</sup>*, this extra DNA is juxtaposed to *iab-7*.

Fig. 2A shows the phenotype observed in homozygous males in which the *promSCS* construct replaces *Fab-7*. In these flies, A3 to A6 were transformed into a mixture of A2-A3 identity, indicating that *iab-3* through *iab-6* are affected by the *promSCS* element. In prior experiments, we have shown that replacement of *Fab-7* by the minimal *scs* insulator (*scs<sup>min</sup>*) in both orientations results in a consistent phenotype in which *iab-5* and *iab-6* are prevented from interacting with *Abd-B* by the intervening insulator (Hogga et al., 2001). Thus, the extra 282 bp DNA element appeared to interfere at a distance with *iab-3* and *iab-4*. Interference with *iab-3* and *iab-4* functions in *promSCS* is surprising, because these *cis*-regulatory domains regulate *abd-A* (see Fig. 5A) and are distant from *promSCS*. This result implies that, *promSCS* exerts a negative polar effect that can spread 40 kb away into *iab-3*. In addition, we have previously provided evidence that, upon insulation from *Abd-B* by the intervening *scs<sup>min</sup>* insulator, *iab-5* is targeted instead to the *abd-A* gene, which it activates in a pattern appropriate

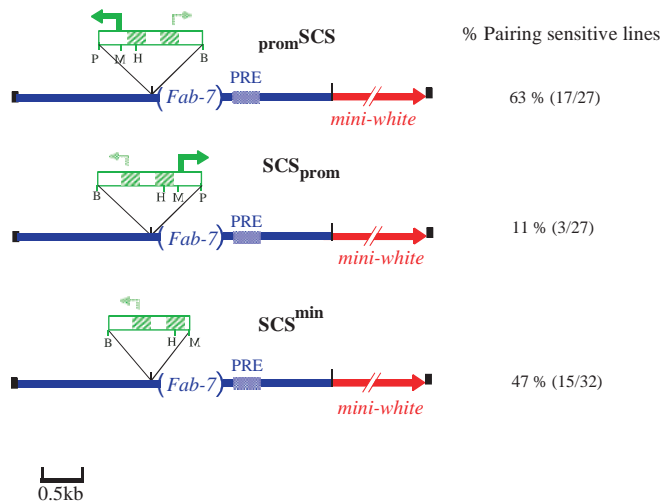

for specifying a A5-like identity (see Hogga et al., 2001). In *promSCS*, A5 is transformed into A2-A3, indicating that the negative polar effect exerted by *promSCS* also affects *iab-5/abd-A* interaction. This phenotype was seen in four independent conversion lines and a whole genome Southern analysis has verified that there are no large rearrangements affecting the *iab-3* through *iab-5* regions of the *promSCS* chromosome. Finally, as heterozygous flies are wild type, the negative polar effect of *promSCS* on *iab-3* through *iab-5* is only acting in *cis*.

**Fig. 2.** Homeotic transformations in *promSCS* and *SCS<sub>prom</sub>*.

Wholemounts of abdominal cuticles (see Materials and Methods for description of the abdominal segments). (A) In homozygous *promSCS* males, the presence of bristles on the sixth sternite (shown by arrows in wild type, left) indicates a homeotic transformation of A6 towards a more anterior segment. On the dorsal side, A5 and A6 tergites have a patchy pigmentation, indicating a transformation into a more anterior abdominal segment. This could reflect a transformation into A4. However, dissection of whole abdomen revealed that they contain only rudimentary gonads. As the somatic part of the gonads is derived from A3 (Bender and Hudson, 2000), rudimentary gonads reflect a transformation towards a more anterior segment. Taken altogether, these homeotic transformations indicate that A3, A4, A5 and A6 are transformed into a more anterior abdominal segment [a mixture of A2 and A3 (2-3)]. (B) A wild-type male has six abdominal segments. The seventh abdominal segment (A7), which is present in larvae, is suppressed during metamorphosis. In *Fab-7<sup>2</sup>*, *iab-7* (left) is ectopically activated in most cells of A6. As a consequence, A6 assumes A7 identity and most of the sixth tergite and sternite are absent. There are, however, cells of A6 in which ectopic activation of *iab-7* does not take place. These cells, which are visible as a small tergite (shown by an arrow), adopt A5 identity, indicating that not only *iab-7* is inactive, but also *iab-6*. In *Fab-7<sup>12</sup>* homozygotes (right), *iab-7* is ectopically expressed in all cells of A6, giving rise to a fly with no apparent tissue in A6 (open arrow). In *SCS<sub>prom</sub>* homozygotes, A6 is completely transformed into A7, as revealed by the complete absence of tergite or sternite tissue in A6 (open arrow). (C) The derepression of *iab-8* in A6 and A7 (*Fab-7* and *Fab-8* phenotype). The A7 into A8 transformation is detectable in females where A7 develops. *SCS<sub>prom</sub>* homozygous females show a phenotype reminiscent of an *Fab-8* boundary deletion, as revealed by the strong reduction of the seventh tergite. Because in *SCS<sub>prom</sub>*, the *Fab-7* boundary function is also affected, the sixth tergite is also reduced in size.

**Fig. 1.** Structure of the different P elements used to induce the swapping of *Fab-7* by *scs*. The 3.1 kb fragment (containing the *Fab-7<sup>2</sup>* deletion) that serves as ectopic donor in the gene conversion experiment is drawn in dark blue at the scale indicated at the bottom of the figure. The *iab-7*PRE abutting the *Fab-7* boundary is indicated. This *Fab-7* fragment is inserted in front of a *miniwhite* gene within a P-element (the feet of the P element are indicated by black rectangles; the *miniwhite* gene in red is not drawn at scale). The structure of the *SCS* element that was inserted in the *NsiI* site just upstream from the *Fab7<sup>2</sup>* deletion endpoint is shown in green above the *Fab-7* DNA line with a few relevant restriction sites (drawn at the same scale; B, *Bam*H1; H, *Hpa*I; M, *Mlu*I; P, *Pst*I). The promoter driving transcription under the control of the *iab cis*-regulatory domains from within the BX-C is indicated in dark green. The promoter described by Avramova and Thikonov (Avramova and Thikonov, 1999) is shown in light green. The percentage of pairing sensitive lines from each construct is indicated with the numbers of lines scored (only homozygous viable lines are reported).

Fig. 2B shows the phenotype observed in homozygous males in which the same *scs* fragment replaces *Fab-7* in the opposite orientation (*SCS<sub>prom</sub>*). Instead of observing the loss-of-function phenotype described above, where A3, A4, A5 and A6 are transformed to a more anterior segment, we found a gain-of-function phenotype in which A6 took the identity of a more posterior segment, A7. This is similar to removal of *Fab-7* entirely. Because in these conversions we

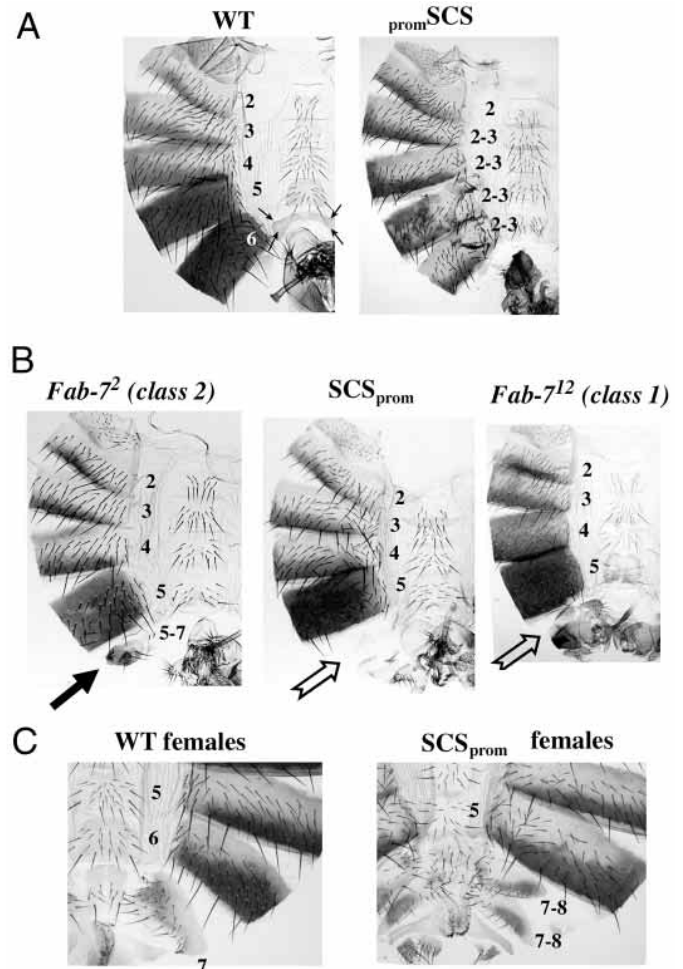



removed *Fab-7* by introducing the *Fab-7<sup>2</sup>* deletion, we confirmed by sequencing that *scs<sub>prom</sub>* is intact. Moreover, the same phenotype is observed in the five other independent conversion events that we recovered. The dominant gain-of-function phenotype associated with *scs<sub>prom</sub>* was confirmed by the observation that heterozygotes (*scs<sub>prom</sub>/+*) displayed the same phenotype, although not as severe. Because the dominant gain of function associated with *scs<sub>prom</sub>* was absent from the flies in which *Fab-7* was replaced by *scs<sup>min</sup>*, we conclude that the same extra 282 bp fragment (*MluI-PstI*) is responsible for the loss-of-function phenotype in *promSCS* and the dominant gain-of-function phenotype in *scs<sub>prom</sub>*.

### An anti-PRE at the edge of *scs<sub>prom</sub>*

Closer examination of the males shown in Fig. 2B revealed that the phenotype of *scs<sub>prom</sub>* flies was slightly different from the phenotype generated by the *Fab-7<sup>2</sup>* deletion alone. As mentioned in the Introduction, class 2 mutations such as *Fab-7<sup>2</sup>*, which remove only the boundary and leave an intact *iab-7*PRE, caused a mixed gain- and loss-of-function phenotype: most cells of A6 adopted A7 identity while the remaining adopted A5 identity (see Fig. 2B). If the *scs<sub>prom</sub>* construct had no effect on the region, we should have observed a *Fab-7<sup>2</sup>* phenotype simply because of the removal of the *Fab-7* element. Fig. 2B shows that this was not the case: A6 was completely transformed into A7 in homozygous *scs<sub>prom</sub>* flies. This phenotype is identical to the phenotype of the class I *Fab-7<sup>12</sup>* allele where the boundary and nearby *iab-7*PRE are deleted (Fig. 2B). Thus, introduction of the *scs<sub>prom</sub>* element converts a class II allele into a class I allele, as if the extra 282 bp fragment (*MluI-PstI*) interfered with the activity of the nearby *iab-7* PRE. To test this hypothesis, we decided to verify how *scs<sub>prom</sub>* affected PRE-mediated pairing-sensitive repression of a miniwhite reporter construct (see Introduction). Although transformants with the *scs* element in the *promSCS* orientation are pairing sensitive in 63% of the lines, when the *scs* element is in the opposite orientation (*scs<sub>prom</sub>*) the pairing-sensitive frequency decreases to 11% (Fig. 1). Thus, our hypothesis that *scs<sub>prom</sub>* within the BX-C contains an anti-PRE activity is supported by these ectopic constructs. To localize this anti-PRE activity, we analyzed the pairing-sensitivity of *scs<sub>prom</sub>* derivatives in which the *scs<sub>prom</sub>* fragment was progressively shaved from one end (see Fig. 1). A deletion removing 282 bp from the end (*MluI-PstI* deletion; *scs<sup>min</sup>*) restored pairing-sensitivity to a frequency of 47%. Because a deletion that extended further towards the *HpaI* site did not significantly increase the proportion of pairing-sensitive lines (50%), we conclude that most of the anti-PRE element of *scs* is located within the *MluI-PstI* fragment.

### The anti-PRE associated with *scs<sub>prom</sub>* interferes with *iab-8* silencing

Examination of homozygous *scs<sub>prom</sub>* females indicated that *iab-8* was also partially activated in the sixth and seventh abdominal segments, both of which show an identity intermediate between A7 and A8, a phenotype that is reminiscent of *Fab-8* boundary deletions (Fig. 2C) (Barges et al., 2001). These observations suggest that the anti-PRE activity contained in *scs<sub>prom</sub>* is not only interfering with the

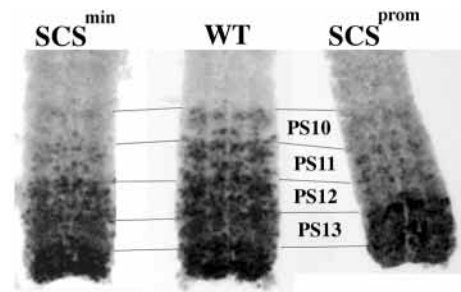

**Fig. 3.** *Abd-B* expression patterns in the central nervous system of homozygous *scs<sup>min</sup>*, wild type and *scs<sub>prom</sub>* embryos. Central nervous systems (CNS) were dissected out from embryos stained with an antibody directed against ABDB as described elsewhere (Hogga et al., 2001). In wild type, the typical graded ABDB expression pattern from PS10 to PS14 is visible. In *scs<sup>min</sup>* CNS, a partial block between *iab-5/iab-6* and *Abd-B* is visible by the weaker signal in PS10 and PS11. In *scs<sub>prom</sub>*, the same impediment appears in PS10. Note however, that in PS11 and PS12, the ABDB expression patterns are similar (unlike in *scs<sup>min</sup>*). The PS11 and PS12 levels and patterns of ABDB expression are not a reiteration of the PS12-specific pattern in wild type (as it would be expected in a *Fab-7* embryo). They reach a level intermediate between the PS10 and PS11 from wild type. The regulatory output of the fused *iab-6-iab-7* domain may be shared between the *scs<sub>prom</sub>* and *Abd-B* promoters (see text).

functioning of the nearby *iab-7* PRE, but spreads across the whole *iab-7* domain and reaches *iab-8*.

### The gain-of-function effect associated with *scs<sub>prom</sub>* is post-embryonic

We also examined the *Abd-B* expression pattern in embryos (Fig. 3). In *scs<sup>min</sup>*, the partial block between *iab-5/iab-6* and the *Abd-B* promoter was visualized by the great reduction of *Abd-B* expression in PS10 and PS11 (Hogga et al., 2001). In *scs<sub>prom</sub>*, because of the posterior transformation of A6 into A7, we were expecting to monitor a reiteration of the PS12/A7 *Abd-B* expression pattern in PS11/A6 (Galloni et al., 1993). This is not what we found. In PS10 and PS11, the expression patterns were similar to the patterns detected in *scs<sup>min</sup>*. In PS12, the expression pattern was much lower than in wild type and was similar to the pattern detected in PS11. In fact, this expression pattern resembled that of an *iab-7* deletion mutant (Galloni et al., 1993). This should lead to a transformation of PS12 into PS11, exactly the opposite of the phenotype that we observe in adults. Unfortunately, there are no distinguishing morphological landmarks in embryos and larvae that definitively identify these two parasegments earlier in development. It is not clear why, in the adult, the readout of *scs<sub>prom</sub>* results in a gain-of-function phenotype, whereas in the embryo, *Abd-B* expression resembles loss of function. We believe these findings indicate that *iab-7* misexpression is more pronounced in the pupa, when the adult structures are forming, strongly supporting the idea that *scs<sub>prom</sub>* affects primarily the maintenance phase. Bender and Fitzgerald have described similar mutations that affect the maintenance phase of *iab-2* silencing in PS6/A1 (Bender and Fitzgerald, 2002). In their case, the identity of the affected abdominal segment PS6/A1 could be easily recognized in embryos and larvae from PS7/A2. Intriguingly, the dominant gain-of-function phenotype associated with their mutations was also only detectable in adult.

**Fig. 4.** Transcripts arising from the *scs* promoter in the BX-C. Organization of the genomic DNA around *Fab-7* in *Fab-7<sup>2</sup>* (left), *promSCS* (middle) and *scs<sub>prom</sub>* (right) flies. The promoter active in *promSCS* and *scs<sub>prom</sub>* is drawn. The A and B strand-specific probes are shown in red: probe A, bases 84,732 to 86,947 in the BX-C sequence (Martin et al., 1995); probe B, 82,554–84,732. The expression pattern of the transcripts in wild type (or *Fab-7<sup>2</sup>*), *promSCS* and *scs<sub>prom</sub>* embryos at 4 and 12 hours of development are shown below. Parasegments are indicated. In *scs<sub>prom</sub>*, we detected a similar expression pattern with a probe spanning the *iab-8*PRE (not shown; from 59,446 to 62,117). It should be noticed that the intensity of rightwards transcription is higher from *scs<sub>prom</sub>* than leftwards transcription originating from *promSCS*. Although the signal usually appears after 1 hour of incubation with the alkaline substrates, with probe B, we had to wait more than twice as long as we did with probe A.

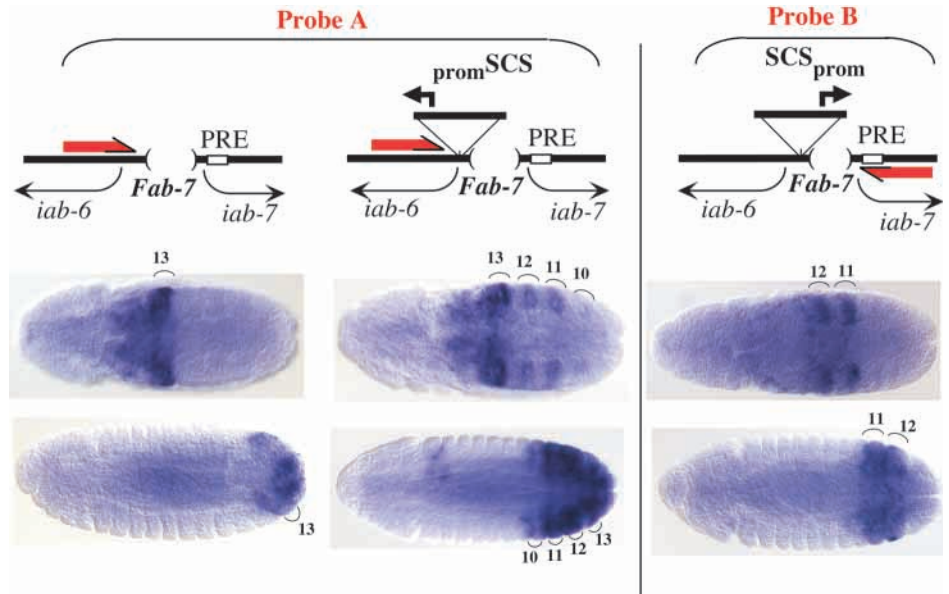

### The region responsible for the orientation-dependent effect contains a promoter

We have previously shown that *scs* contains a chromatin insulator element (*scs<sup>min</sup>*) that is able to interfere with long-range enhancer-promoter interactions (Hogga et al., 2001). In addition to the insulator, the 1.2 kb *scs* fragment contains at one extremity an element that, in conjunction with *scs<sup>min</sup>*, is able to induce a gain-of or loss-of-function phenotype when replacing *Fab-7*. When facing *iab-7*, this element destabilizes *iab-7* and *iab-8* silencing in A6. However, when facing *iab-6*, this element exerts a negative polar effect on *iab-5*, *iab-4* and *iab-3*. These two gain- and loss-of-function effects are difficult to reconcile. Previously, Avramova and Tikhonov (Avramova and Tikhonov, 1999) discovered that *scs* contained a promoter and challenged the idea that *scs* was a neutral chromatin domain boundary. Their finding supported the promoter decoy hypothesis of Geyer (Geyer, 1997), in which insulation is achieved by a promoter-trapping mechanism. Although the promoter described by Avramova and Thikonov (Avramova and Thikonov, 1999) maps to the other side of *scs* (see Fig. 1), promoter trapping could account for the polar effect on *iab-5*, *iab-4* and *iab-3*. In this scheme, insertion of a promoter at the *iab-6* edge of *Fab-7* would attract the nearby *cis*-regulatory elements and divert them from their normal *abd-A* and/or *Abd-B* promoter (see Fig. 5A). In this case, transcription of sequences near the promoter should be detected in parasegments affected by *promSCS* (and *scs<sub>prom</sub>*). In order to test this hypothesis, we performed whole-mount in situ hybridization on embryos of the *promSCS* and *scs<sub>prom</sub>* lines. We synthesized strand-specific probes from the *iab-6* (probe A; Fig. 4) or *iab-7* DNA (probe B; Fig. 4) flanking the *scs* element. Using both probes on *promSCS*, *scs<sub>prom</sub>* and *scs<sup>min</sup>* lines, we found that the promoter described by Avramova and Thikonov (Avramova and Thikonov, 1999) remained silent in the context of the BX-C. There was, however, a promoter that became active in the context of the BX-C at the other side of the *scs* fragment. Fig. 4 shows the results obtained with a probe from

the *iab-6* side of *promSCS* (probe A). In wild type (or *Fab-7<sup>2</sup>*), transcription was detected from a very early stage throughout embryogenesis in PS13 and PS14. The expression profile of this transcript was reminiscent of a transcript that originates from a promoter localized just downstream from the *Abd-B* transcription unit (Zhou et al., 1999). In *promSCS* embryos, however, we detected additional transcripts in PS10/A5, PS11/A6 and PS12/A7. Interestingly, we failed to detect these transcripts when the truncated version of *promSCS* (*scs<sup>min</sup>*) replaced *Fab-7*, indicating that the *MluI-PstI* fragment contains the promoter (or sequences necessary for its activity). Appearance of PS10-specific transcripts may explain the polar effect of *promSCS* on *iab-5* if we assume that *iab-5* activity is trapped by the *scs* promoter and thus diverted from the *abd-A* promoter [in the *promSCS* context, *iab-5* is insulated from *Abd-B* by the intervening *scs<sup>min</sup>* insulator, see Hogga et al. (Hogga et al., 2001)]. A similar mechanism would explain the polar effect on *iab-4* and *iab-3* (Fig. 5A). However, we failed to detect transcription in PS9 and PS8, where both regulatory domains are active (Fig. 4). The discrepancy between the observed pattern of embryonic transcription and the adult phenotype may reflect a higher affinity of the promoter to *iab-3,4* in adults.

It is not entirely clear which regulatory domain activates transcription in PS12. In the *promSCS* context, the *scs* insulator is located between the promoter and the *iab-7* *cis*-regulatory domain. As reported by Hogga et al. (Hogga et al., 2001), the insulator alone does not completely impair interactions between the distal *iab-5/iab-6* *cis*-regulatory domains and their *Abd-B* target promoter (see also Fig. 3). Thus, in *promSCS*, *iab-7* may not be completely insulated from the promoter and activates transcription in PS12. As an alternative explanation we believe that transcription in PS12 in *promSCS* embryos results from activation by the more anterior *cis*-regulatory domains (*iab-3*, *iab-4*, *iab-5* or *iab-6*), which once activated in a given parasegment, remain active in the more posterior parasegments, as first proposed in Ed Lewis' model (Lewis,

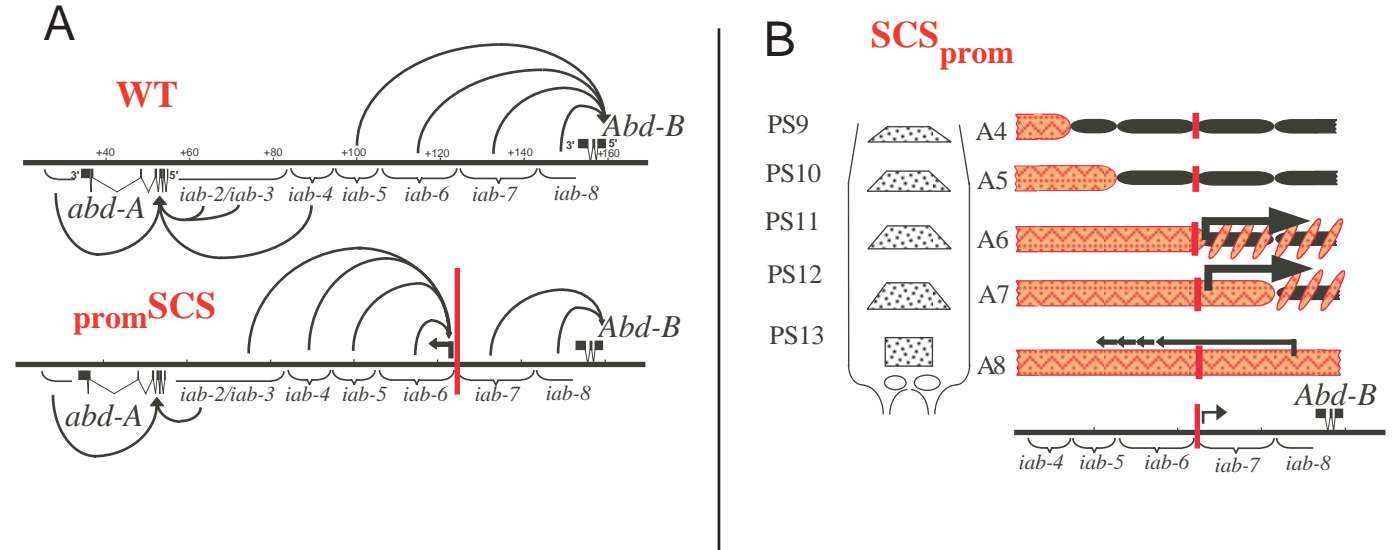

**Fig. 5.** Summaries of the effects caused by the replacement of *Fab-7* by <sup>prom</sup>SCS or SCS<sup>prom</sup>. (A) The thin horizontal line represents the genomic DNA of the abdominal region of the BX-C marked off in kb according to Karch et al. (Karch et al., 1985). The structures of the *abd-A* and *Abd-B* transcription units are shown. The *cis*-regulatory interaction between the *iab* domains and their respective target promoters are shown by loops. While *iab-2*, *iab-3* and *iab-4* regulate *abd-A* in PS7, PS8 and PS9 respectively, *iab-5*, *iab-6*, *iab-7* and *iab-8* regulate *Abd-B* expression in PS10, PS11, PS12 and PS13. The red vertical bar represents the scs<sup>min</sup> insulator that prevents *Abd-B* activation by *iab-5* and *iab-6*. Upon isolation from *Abd-B*, *iab-5* is able to interact with *abd-A* (Hogga et al., 2001). In <sup>prom</sup>SCS, the promoter on the left of the insulator would be activated by *iab-3*, *iab-4* and *iab-5*, diverting these regulatory domains from the *abd-A* promoter. This results in the loss-of-function phenotype of *iab-3*, *iab-4* and *iab-5* (loss-of-function of *iab-6* is due to the inability of *iab-6* to regulate *Abd-B* properly because of the intervening scs<sup>min</sup> insulator) (Hogga et al., 2001). (B) The posterior abdomen of a larva from A4/PS9 to A8/PS13 is shown on the left. On the right, the activity states of *iab-4* to *iab-8* *cis*-regulatory domains are shown in their respective segments/parasegments. For example, in A4/PS9, *iab-4* is active (red), whereas the remaining *iab-5*, *iab-6*, *iab-7* and *iab-8* are kept inactive by the Pc-G-repressing complex (shown in black). In A5/PS10 the next adjacent *cis*-regulatory domain *iab-5* is activated. In A6/PS11, *iab-6* becomes active. As the scs<sup>min</sup> insulator (red bar) does not insulate *iab-6* fully from *Abd-B*, we envision that *iab-6* activates the scs promoter across the insulator in A6/PS11, leading to transcription through *iab-7* and *iab-8* (shown by the thick arrow). As transcription would interfere with Pc-G complex silencing, ectopic activation of *iab-7* and *iab-8* occurs in A6/PS11, giving rise to the *Fab-7/8* homeotic transformations.

1978). It should be noted that although promoter-trapping is an attractive explanation accounting for the polar effect of  $\text{promSCs}$  on the *iab-3*, *iab-4*, *iab-5* and *iab-6*, we cannot exclude the possibility that transcription through these cis-regulatory domains is the cause of their inactivation.

### Transcription through the *iab-7*PRE may interfere with *iab-7* silencing

In  $\text{scs}_{\text{prom}}$ , the edge of  $\text{scs}$  containing the promoter is facing the *iab-7* cis-regulatory domain. Not surprisingly, we detected intense transcription in PS12 with a probe from the *iab-7* edge (probe B, Fig. 4). The same probe failed to detect any transcript in wild type or in embryos in which *Fab-7* is replaced by  $\text{scs}^{\text{min}}$ . These results indicate that the PS12-specific transcript very likely originates from the same promoter that is firing in PS10-12 in  $\text{promSCS}$ . We also detected equally intense transcription in PS11. Thus, the fragment harboring anti-PRE activity when associated with  $\text{scs}_{\text{prom}}$ , contains a promoter that fires transcription across the *iab-7*PRE with which it interferes. As mentioned above, the anti-PRE activity contained in  $\text{scs}_{\text{prom}}$  not only interferes with the functioning of the nearby *iab-7*PRE, but spreads across the whole *iab-7* domain and reaches *iab-8*. Notably, the same transcription pattern in PS11 and PS12 is observed with a strand-specific probe originating from *iab-8* (data not shown, see Fig. 4).

Fig. 5B suggests how the transcription from *sca<sub>prom</sub>* might

cause the posterior transformation in the sixth and seventh abdominal segments (PS11 and PS12). The promoter in  $scs_{\text{prom}}$  is activated in PS11 and PS12 (Fig. 4), sending transcripts across the *iab-7* and *iab-8* regulatory regions. In PS11, both of these regulatory regions are normally silent, but the act of transcription apparently reverses the silencing, causing the cells in PS11 to differentiate in the same way as those of PS12 or PS13. Likewise, in PS12, transcription across the *iab-8* region activates it, transforming PS12 cells towards PS13 character. We do not observe transcription from  $scs_{\text{prom}}$  in PS13. In this parasegment, however, the *iab-8* promoter is activated, giving rise to leftwards transcription (Zhou et al., 1999). It is possible that this leftwards transcription interferes with rightwards transcription from  $scs_{\text{prom}}$ . It is perhaps surprising that the transcription from  $scs_{\text{prom}}$  begins in PS11, as the PS12-specific regulatory region (*iab-6*) is separated from the promoter of  $scs_{\text{prom}}$  by the *scs* insulator. However, the insulator in an  $scs^{\text{min}}$  conversion at the same site does not completely insulate *iab-6* from the *Abd-B* target promoter (Hogga et al., 2001) (see also Fig. 3), making it likely that *iab-6* can activate the  $scs_{\text{prom}}$  across the insulator. It is also possible that the function of an insulator depends on neighboring sequences. If, for example, insulator function is enhanced by a nearby PRE, then partial loss of the *iab-7*PRE function might weaken the  $scs_{\text{prom}}$  insulator.

There are precedents where transcription has been suggested



to play a role in chromatin remodeling. For example, the human  $\beta$ -globin locus is subdivided into three chromatin domains, each of which become more accessible to nuclease digestions upon gene activation (Ashe et al., 1997; Gribnau et al., 2000; Plant et al., 2001). Interestingly, large intergenic transcripts delineate each of these domains and chromatin remodeling of each domain is preceded by its transcription. Another example has been reported by Rank et al. (Rank et al., 2002). Using a transgenic context, they found that transcription across a PRE could interfere with silencing. Finally, in the accompanying paper, Fitzgerald and Bender provide evidence that transcription across the *iab-2* cis-regulatory domains in PS6/A1 interferes with *iab-2* silencing, resulting in the posterior transformation of PS6/A1 into PS7/A2 (Bender and Fitzgerald, 2002). In this case, the identity of the affected abdominal segment can easily be recognized in embryos and larvae. Despite the existence of intense transcription of *iab-2* in embryos, the dominant gain-of-function phenotype associated with *iab-2* misexpression is only detectable in the adult. Thus, as in our case, transcription across the *iab* regulatory regions appear to interfere with silencing during the late maintenance phase, when the adult structures are forming.

If transcription can interfere with Pc-G silencing, what are the mechanisms responsible for this activity? Factors that affect RNA polymerase II (RNAPII) transcript elongation have been shown to have an effect on chromatin. For example, it has been suggested that histone acetyl transferases (HAT) such as PCAF (Cho, 1998) or *ELP3* (Wittschieben, 1999) assist RNAPII in relieving inhibition caused by nucleosome arrays. Although active chromatin requires acetylation of specific lysine residues in the H3 and/or H4 histone tails (Moazed, 2001), the recent purification of Pc complexes suggests that histone deacetylation is required for establishing a stable long-term Pc-G silencing complex (Saurin et al., 2001; Tie et al., 2001). In the case of *scs<sub>prom</sub>*, perhaps the frequent passage of RNAPII and its associated histone acetylation activities though the PREs interferes with the assembly of the Pc-G silencing. Involvement of acetylated histones in antagonizing PcG-dependent silencing is supported by the findings of Cavalli and Paro (Cavalli and Paro, 1999) showing that high levels of acetylated histone H4 are associated with non-repressive PRE sequences. Alternatively, it has been recently found that variant histone H3.3 was deposited on active chromatin during transcription, providing a mechanism for the immediate activation of genes that are silenced by histone modification (Ahmad and Henikoff, 2002). It may be possible that transcription across *iab-7* (and also *iab-8*) results in deposition of new nucleosome marked by H3.3, interfering thereby with the maintenance of silencing by the Pc-G complex.

### Concluding remarks

It has been known for a long time that the large cis-regulatory regions of the bithorax complex are transcribed (Lipshitz et al., 1987; Sanchez-Herrero and Akam, 1989; Cumberland et al., 1990). In blastoderm stage embryos, the *iab-2* though *iab-8* regions can be divided into three domains, each transcribed in a region that extends from a specific anterior limit to the posterior limit of the segmented part of the embryo. These domains are only broadly defined but their order on the chromosome reflects the anterior limit of expression for each of them. In the light of our data, it is tempting to speculate that

transcription of the *iab* domains convey a regulatory signal, preventing assembly of the *Polycomb*-repressing complex on the *iab* domains that need to remain active. If this is true, transcripts should appear in the anteriormost parasegments/segments where each cis-regulatory domain is activated. However, so far, we have not seen transcripts in every regulatory region, which would account for the sequential activation of each regulatory domain. Moreover, this model predicts that the *iab-7* PRE and *iab-7* domains should be transcribed from PS12, where *iab-7* is first active. So far transcripts across the *iab-7* domain have only been detected in PS13 and 14 (this study) (Zhou et al., 1999). Thus, it remains unclear whether intergenic transcription plays a role in wild-type animals to create and/or maintain open chromatin, or whether the existence of intergenic transcripts is the consequence of an open structure. However, our experiments strongly suggest that forced transcription through an inactive cis-regulatory domain interferes with the maintenance of silencing, highlighting an incompatibility between transcription and Pc-G mediated silencing. This activity probably reflects a fundamental mechanism to protect an actively transcribed gene from being inactivated by the Pc-G proteins that are present in all cells.

We are indebted to H. Gyurkovics for numerous discussions and suggestions during the course of this work, and to W. Bender and R. Paro for sharing unpublished data. We also acknowledge R. Meada and Y. Moshkin for critical reading of the manuscript. We thank J. Weiss for his help with transcripts detection on whole embryos, A. Spierer for injections and J. Vasquez for providing the initial SCS clone. Finally, we thank E. Favre and G. Faustino for excellent technical assistance. This work was supported by the Swiss national Found, the State of Geneva and the Human Frontier Science Organization.

### REFERENCES

- Ahmad, K. and Henikoff, S. (2002). The histone variant H3.3 marks chromatin by replication-independent nucleosome assembly. *Mol. Cell* **9**, 1191-1200.
- Ashe, H. L., Monks, J., Wijgerde, M., Fraser, P. and Proudfoot, N. J. (1997). Intergenic transcription and transinduction of the human beta-globin locus. *Genes Dev.* **11**, 2494-2509.
- Avramova, Z. and Tikhonov, A. (1999). Are *scs* and *scs'* 'neutral' chromatin domain boundaries of the locus? *Trends Genet.* **15**, 138-139.
- Barges, S., Mihaly, J., Galloni, M., Hagstrom, K., Müller, M., Shanower, G., Schedl, P., Gyurkovics, H. and Karch, F. (2000). The *Fab-8* boundary defines the distal limit of the bithorax complex *iab-7* domain and insulates *iab-7* from initiation elements and a PRE in the adjacent *iab-8* domain. *Development* **127**, 779-790.
- Bell, A. C., West, A. G. and Felsenfeld, G. (2001). Insulators and boundaries: versatile regulatory elements in the eukaryotic genome. *Science* **291**, 447-450.
- Bender, W. and Fitzgerald, D. P. (2002). Transcription activates repressed domains of the *Drosophila* bithorax complex. *Development* **129**, 4923-4930.
- Bender, W. and Hudson, A. (2000). P element homing to the *Drosophila* bithorax complex. *Development* **127**, 3981-3992.
- Busturia, A. and Bienz, M. (1993). Silencers in abdominal-B, a homeotic *Drosophila* gene. *EMBO J.* **12**, 1415-1425.
- Cavalli, G. and Paro, R. (1999). Epigenetic inheritance of active chromatin after removal of the main transactivator. *Science* **286**, 955-958.
- Celniker, S. E., Sharma, S., Keelan, D. J. and Lewis, E. B. (1990). The molecular genetics of the bithorax complex of *Drosophila*: cis-regulation in the Abdominal-B domain. *EMBO J.* **9**, 4277-4286.
- Chan, C. S., Rastelli, L. and Pirrotta, V. (1994). A Polycomb response

- element in the *Ubx* gene that determines an epigenetically inherited state of repression. *EMBO J.* **13**, 2553-2564.
- Chiang, A., O'Connor, M. B., Paro, R., Simon, J. and Bender, W. (1995). Discrete Polycomb-binding sites in each parasegmental domain of the bithorax complex. *Development* **121**, 1681-1689.
- Cho, H., Orphanides, G., Sun, X., Yang, X. J., Ogryzko, V., Lees, E., Nakatani, Y. and Reinberg, D. (1998). A human RNA polymerase II complex containing factors that modify chromatin structure. *Mol. Cell. Biol.* **18**, 5355-5363.
- Cumberledge, S., Zaratzian, A. and Sakonju, S. (1990). Characterization of two RNAs transcribed from the cis-regulatory region of the *abd-A* domain within the *Drosophila* bithorax complex. *Proc. Natl. Acad. Sci. USA* **87**, 3259-3263.
- Dunaway, M., Hwang, J. Y., Xiong, M. and Yuen, H. L. (1997). The activity of the *scs* and *scs'* insulator elements is not dependent on chromosomal context. *Mol. Cell. Biol.* **17**, 182-189.
- Duncan, I. (1987). The bithorax complex. *Annu. Rev. Genet.* **21**, 285-319.
- Galloni, M., Gyurkovics, H., Schedl, P. and Karch, F. (1993). The bluetail transposon: evidence for independent cis-regulatory domains and domain boundaries in the bithorax complex. *EMBO J.* **12**, 1087-1097.
- Gerasimova, T. I. and Corces, V. G. (1996). Boundary and insulator elements in chromosomes. *Curr. Opin. Genet. Dev.* **6**, 185-192.
- Geyer, P. K. (1997). The role of insulator elements in defining domains of gene expression. *Curr. Opin. Genet. Dev.* **7**, 242-248.
- Geyer, P. K. and Corces, V. G. (1992). DNA position-specific repression of transcription by a *Drosophila* zinc finger protein. *Genes Dev.* **6**, 1865-1873.
- Gindhart, J. G., Jr and Kaufman, T. C. (1995). Identification of Polycomb and trithorax group responsive elements in the regulatory region of the *Drosophila* homeotic gene *Sex combs reduced*. *Genetics* **139**, 797-814.
- Gribnau, J., Diderich, K., Pruzina, S., Calzolari, R. and Fraser, P. (2000). Intergenic transcription and developmental remodeling of chromatin subdomains in the human beta-globin locus. *Mol. Cell* **5**, 377-386.
- Gyurkovics, H., Gausz, J., Kummer, J. and Karch, F. (1990). A new homeotic mutation in the *Drosophila* bithorax complex removes a boundary separating two domains of regulation. *EMBO J.* **9**, 2579-2585.
- Hagstrom, K., Muller, M. and Schedl, P. (1997). A Polycomb and GAGA dependent silencer adjoins the *Fab-7* boundary in the *Drosophila* bithorax complex. *Genetics* **146**, 1365-1380.
- Hogga, I., Mihaly, J., Barges, S. and Karch, F. (2001). Replacement of *Fab-7* by the gypsy or *scs* insulator disrupts long-distance regulatory interactions in the *Abd-B* gene of the bithorax complex. *Mol. Cell* **8**, 1145-1151.
- Karch, F., Weiffenbach, B., Peifer, M., Bender, W., Duncan, I., Celniker, S., Crosby, M. and Lewis, E. B. (1985). The abdominal region of the bithorax complex. *Cell* **43**, 81-96.
- Kassis, J. A., VanSickle, E. P. and Sensabaugh, S. M. (1991). A fragment of engrailed regulatory DNA can mediate transvection of the white gene in *Drosophila*. *Genetics* **128**, 751-761.
- Kellum, R. and Schedl, P. (1991). A position-effect assay for boundaries of higher order chromosomal domains. *Cell* **64**, 941-950.
- Kellum, R. and Schedl, P. (1992). A group of *scs* elements function as domain boundaries in an enhancer-blocking assay. *Mol. Cell. Biol.* **12**, 2424-2431.
- Krebs, J. E. and Dunaway, M. (1998). The *scs* and *scs'* insulator elements impart a cis requirement on enhancer-promoter interactions. *Mol. Cell* **1**, 301-308.
- Lewis, E. B. (1978). A gene complex controlling segmentation in *Drosophila*. *Nature* **276**, 565-570.
- Lipshitz, H. D., Peattie, D. A. and Hogness, D. S. (1987). Novel transcripts from the Ultrabithorax domain of the bithorax complex. *Genes Dev.* **1**, 307-322.
- Martin, C. H., Mayeda, C. A., Davis, C. A., Ericsson, C. L., Knafels, J. D., Mathog, D. R., Celniker, S. E., Lewis, E. B. and Palazzolo, M. J. (1995). Complete sequence of the bithorax complex of *Drosophila*. *Proc. Natl. Acad. Sci. USA* **92**, 8398-8402.
- Mihaly, J., Hogga, I., Gausz, J., Gyurkovics, H. and Karch, F. (1997). In situ dissection of the *Fab-7* region of the bithorax complex into a chromatin domain boundary and a Polycomb-response element. *Development* **124**, 1809-1820.
- Mihaly, J., Hogga, I., Barges, S., Galloni, M., Mishra, R. K., Hagstrom, K., Muller, M., Schedl, P., Sipos, L., Gausz, J., Gyurkovics, H. and Karch, F. (1998). Chromatin domain boundaries in the Bithorax complex. *Cell. Mol. Life Sci.* **54**, 60-70.
- Moazed, D. (2001). Common themes in mechanisms of gene silencing. *Mol. Cell* **8**, 489-498.
- Muller, J. and Bienz, M. (1991). Long range repression conferring boundaries of Ultrabithorax expression in the *Drosophila* embryo. *EMBO J.* **10**, 3147-3155.
- Muller, J. and Bienz, M. (1992). Sharp anterior boundary of homeotic gene expression conferred by the *fushi tarazu* protein. *EMBO J.* **11**, 3653-3661.
- Muller, M., Hagstrom, K., Gyurkovics, H., Pirrotta, V. and Schedl, P. (1999). The *mcp* element from the *Drosophila melanogaster* bithorax complex mediates long-distance regulatory interactions. *Genetics* **153**, 1333-1356.
- Parnell, T. J. and Geyer, P. K. (2000). Differences in insulator properties revealed by enhancer blocking assays on episomes. *EMBO J.* **19**, 5864-5874.
- Paro, R. (1990). Imprinting a determined state into the chromatin of *Drosophila*. *Trends Genet.* **6**, 416-421.
- Peifer, M., Karch, F. and Bender, W. (1987). The bithorax complex: control of segmental identity. *Genes Dev.* **1**, 891-898.
- Pirrotta, V. and Rastelli, L. (1994). White gene expression, repressive chromatin domains and homeotic gene regulation in *Drosophila*. *BioEssays* **16**, 549-556.
- Plant, K. E., Routledge, S. J. and Proudfoot, N. J. (2001). Intergenic transcription in the human beta-globin gene cluster. *Mol. Cell. Biol.* **21**, 6507-6514.
- Poux, S., Kostic, C. and Pirrotta, V. (1996). Hunchback-independent silencing of late *Ubx* enhancers by a Polycomb Group Response Element. *EMBO J.* **15**, 4713-4722.
- Qian, S., Capovilla, M. and Pirrotta, V. (1991). The *bx* region enhancer, a distant cis-control element of the *Drosophila Ubx* gene and its regulation by hunchback and other segmentation genes. *EMBO J.* **10**, 1415-1425.
- Rank, G., Prestel, M. and Paro, R. (2002). Transcription through intergenic chromosomal memory elements of the *Drosophila* bithorax complex correlates with an epigenetic switch. *Mol. Cell. Biol.* (in press).
- Roseman, R. R., Pirrotta, V. and Geyer, P. K. (1993). The *su(Hw)* protein insulates expression of the *Drosophila melanogaster* white gene from chromosomal position-effects. *EMBO J.* **12**, 435-442.
- Sanchez-Herrero, E. (1991). Control of the expression of the bithorax complex genes abdominal-A and abdominal-B by cis-regulatory regions in *Drosophila* embryos. *Development* **111**, 437-449.
- Sanchez-Herrero, E. and Akam, M. (1989). Spatially ordered transcription of regulatory DNA in the bithorax complex of *Drosophila*. *Development* **107**, 321-329.
- Sanchez-Herrero, E., Vernos, I., Marco, R. and Morata, G. (1985). Genetic organization of *Drosophila* bithorax complex. *Nature* **313**, 108-113.
- Saurin, A. J., Shao, Z., Erdjument-Bromage, H., Tempst, P. and Kingston, R. E. (2001). A *Drosophila* Polycomb group complex includes Zeste and dTAFII proteins. *Nature* **412**, 655-660.
- Shimell, M. J., Simon, J., Bender, W. and O'Connor, M. B. (1994). Enhancer point mutation results in a homeotic transformation in *Drosophila*. *Science* **264**, 968-971.
- Simon, J. A. and Tamkun, J. W. (2002). Programming off and on states in chromatin: mechanisms of Polycomb and trithorax group complexes. *Curr. Opin. Genet. Dev.* **12**, 210-218.
- Simon, J., Chiang, A., Bender, W., Shimell, M. J. and O'Connor, M. (1993). Elements of the *Drosophila* bithorax complex that mediate repression by Polycomb group products. *Dev. Biol.* **158**, 131-144.
- Simon, J., Peifer, M., Bender, W. and O'Connor, M. (1990). Regulatory elements of the bithorax complex that control expression along the anterior-posterior axis. *EMBO J.* **9**, 3945-3956.
- Sun, F. L. and Elgin, S. C. (1999). Putting boundaries on silence. *Cell* **99**, 459-462.
- Tie, F., Furuyama, T., Prasad-Sinha, J., Jane, E. and Harte, P. J. (2001). The *Drosophila* Polycomb Group proteins ESC and E(Z) are present in a complex containing the histone-binding protein p55 and the histone deacetylase RPD3. *Development* **128**, 275-286.
- Vazquez, J. and Schedl, P. (1994). Sequences required for enhancer blocking activity of *scs* are located within two nuclease-hypersensitive regions. *EMBO J.* **13**, 5984-5993.
- Wittschieben, B. O., Otero, G., de Bizemont, T., Fellows, J., Erdjument-Bromage, H., Ohba, R., Li, Y., Allis, C. D., Tempst, P. and Svejstrup, J. Q. (1999). A novel histone acetyltransferase is an integral subunit of elongating RNA polymerase II holoenzyme. *Mol. Cell* **4**, 123-128.
- Zhou, J., Ashe, H., Burks, C. and Levine, M. (1999). Characterization of the transvection mediating region of the abdominal-B locus in *Drosophila*. *Development* **126**, 3057-3065.
